# Supplementary material for: Relationship of Handgrip Strength and Body Mass Index With Cognitive Function in Patients With Schizophrenia
Source: PubMed Central journal article supplement (PMC5930849; doi:10.3389/fpsyt.2018.00156), 2018-04-25
Supplement: Image_1.pdf [file Image_1.pdf]

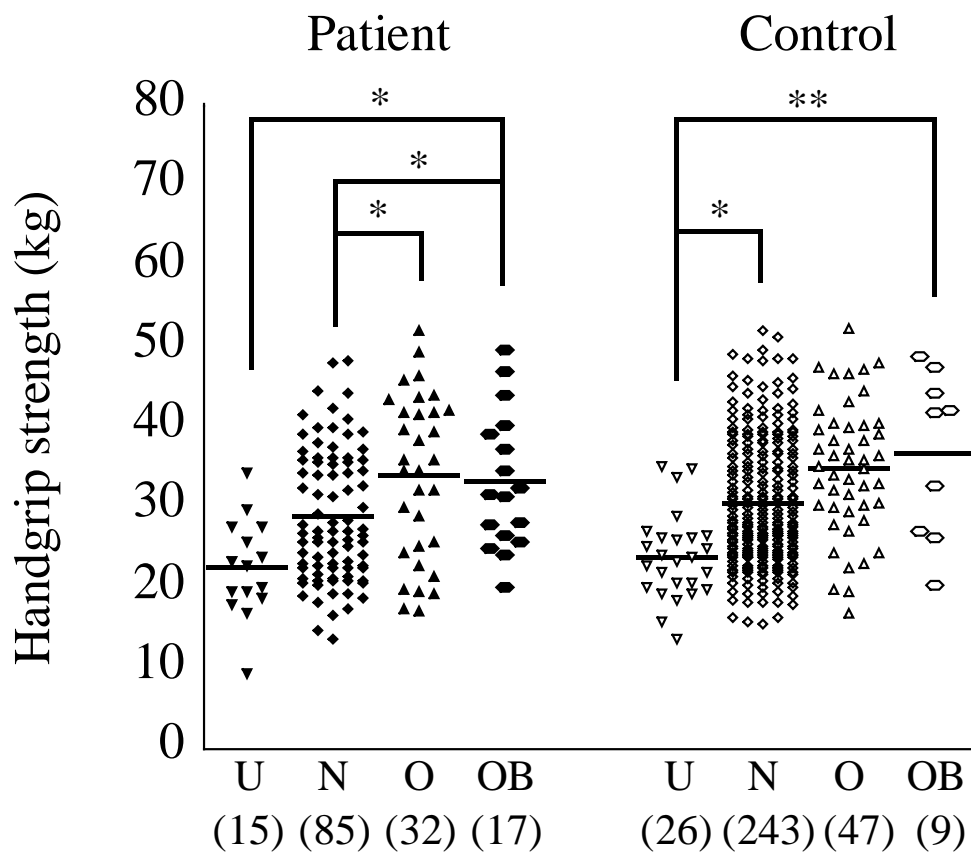

**Figure S1. Comparisons of handgrip strength scores by body mass index-based classification.**

In patients with schizophrenia, significantly lower scores were observed in the underweight group compared to obese group (corrected  $p = 0.033$ ). In addition, significantly lower scores were observed in the normal group compared to overweight (corrected  $p = 0.023$ ) and obese (corrected  $p = 0.022$ ) groups ( $F [3, 137] = 5.59, \eta^2 = 0.049$ ). In healthy controls, significantly lower scores were observed in the underweight group compared to normal (corrected  $p = 0.023$ ) and obese (corrected  $p = 0.002$ ) groups ( $F [3, 319] = 5.04, \eta^2 = 0.018$ ). Horizontal lines in dots indicate the mean scores. Numbers in parentheses represent the numbers of participants. \*  $p < 0.05$ , \*\*  $p < 0.01$ .

U, underweight; N, normal; O, overweight; OB, obese
